# Supplementary material for: Genome-wide genotyping data renew knowledge on genetic diversity of a worldwide alfalfa collection and give insights on genetic control of phenology traits
Source: Front Plant Sci. 2023 Jul 5;14:1196134. doi: 10.3389/fpls.2023.1196134 (PMC10354441; doi:10.3389/fpls.2023.1196134)
Supplement: Supplementary file 2 [file Table_1.xlsx]

## Sheet: Table06-LD_dist_QTLs
Supplementary Table 4 : Linkage disequilibrium (squared partial correlation) and distance (in base) between SNPs having a potential effect on different traits linked to fall dormancy (Dormance : D,height :PH, Dry Matter Yield : F-F-DMY) for different locations ( Lusignan : L and Novi Sad : N ) over three years of trials ( 2019 : X19.X and 2020 : X20.X ) or overall (F-F-DMY). The lower par represe…
Traits							D19.L												PH21.L				PH21.L
			F-DMY	PH19.L	F-DMY20.N	PH19.N	F-DMY19.L	F-DMY	PH20.N	F-DMY	PH19.N	F-DMY	PH19.L	PH19.N	PH19.N	F-DMY20.N	F-DMY20.N	F-DMY20.N	SE21.L	F-DMY20.N	F-DMY20.N	PH19.N	SE21.L	PH20.N	D19.L	F-DMY
		SNP	chr2_2373521	chr2_12854184	chr2_12854196	chr2_13623107	chr2_14385543	chr3_44341487	chr3_61230828	chr3_61230888	chr3_73810222	chr3_89061410	chr3_89061526	chr3_90724627	chr4_5061600	chr5_72247110	chr6_40691177	chr6_82734617	chr7_46045300	chr7_53172294	chr7_62988589	chr7_90834458	chr7_90860527	chr8_51582915	chr8_51582964	chr8_74701919
	F-DMY	chr2_2373521		0.000198663	0.000110041	0.00103692	0.0196568
	PH19.L	chr2_12854184	10480663		0.967961	0.00680482	0.00148709
	F-DMY20.N	chr2_12854196	10480675	12		0.00762868	1.27391e-07
	PH19.N	chr2_13623107	11249586	768923	768911		0.0870338
D19.L	F-DMY19.L	chr2_14385543	12012022	1531359	1531347	762436
	F-DMY	chr3_44341487							0.00609519	0.00063339	0.00872971	0.000603557	2.83241e-05	0.0246319
	PH20.N	chr3_61230828						16889341		0.0484576	0.00853748	0.00376545	0.00799441	0.00322997
	F-DMY	chr3_61230888						16889401	60		0.00375375	3.32942e-05	6.59243e-05	0.000624485
	PH19.N	chr3_73810222						29468735	12579394	12579334		0.00169834	0.00141454	0.00432203
	F-DMY	chr3_89061410						44719923	27830582	27830522	15251188		0.472272	0.000121107
	PH19.L	chr3_89061526						44720039	27830698	27830638	15251304	116		0.000645676
	PH19.N	chr3_90724627						46383140	29493799	29493739	16914405	1663217	1663101
	PH19.N	chr4_5061600
	F-DMY20.N	chr5_72247110
	F-DMY20.N	chr6_40691177																0.00123278
	F-DMY20.N	chr6_82734617															42043440
PH21.L	SE21.L	chr7_46045300																		0.00345992	0.00558849	0.00494397	7.97389e-05
	F-DMY20.N	chr7_53172294																	7126994		0.0332122	0.00305155	0.0240641
	F-DMY20.N	chr7_62988589																	16943289	9816295		0.00519216	0.000777812
	PH19.N	chr7_90834458																	44789158	37662164	27845869		0.00171074
PH21.L	SE21.L	chr7_90860527																	44815227	37688233	27871938	26069
	PH20.N	chr8_51582915																							0.980706	0.000331888
	D19.L	chr8_51582964																						49		0.000181116
	F-DMY	chr8_74701919																						23119004	23118955
